# Supplementary material
Source: MDPI journal article supplement (https://www.mdpi.com/2073-4441/12/4/1168)
Supplement: s1 [file s1]

*Supplementary Information for*

**Linking the recent glacier retreat and depleting streamflow patterns with land system changes in Kashmir Himalaya, India**

By Rashid et al. 2020

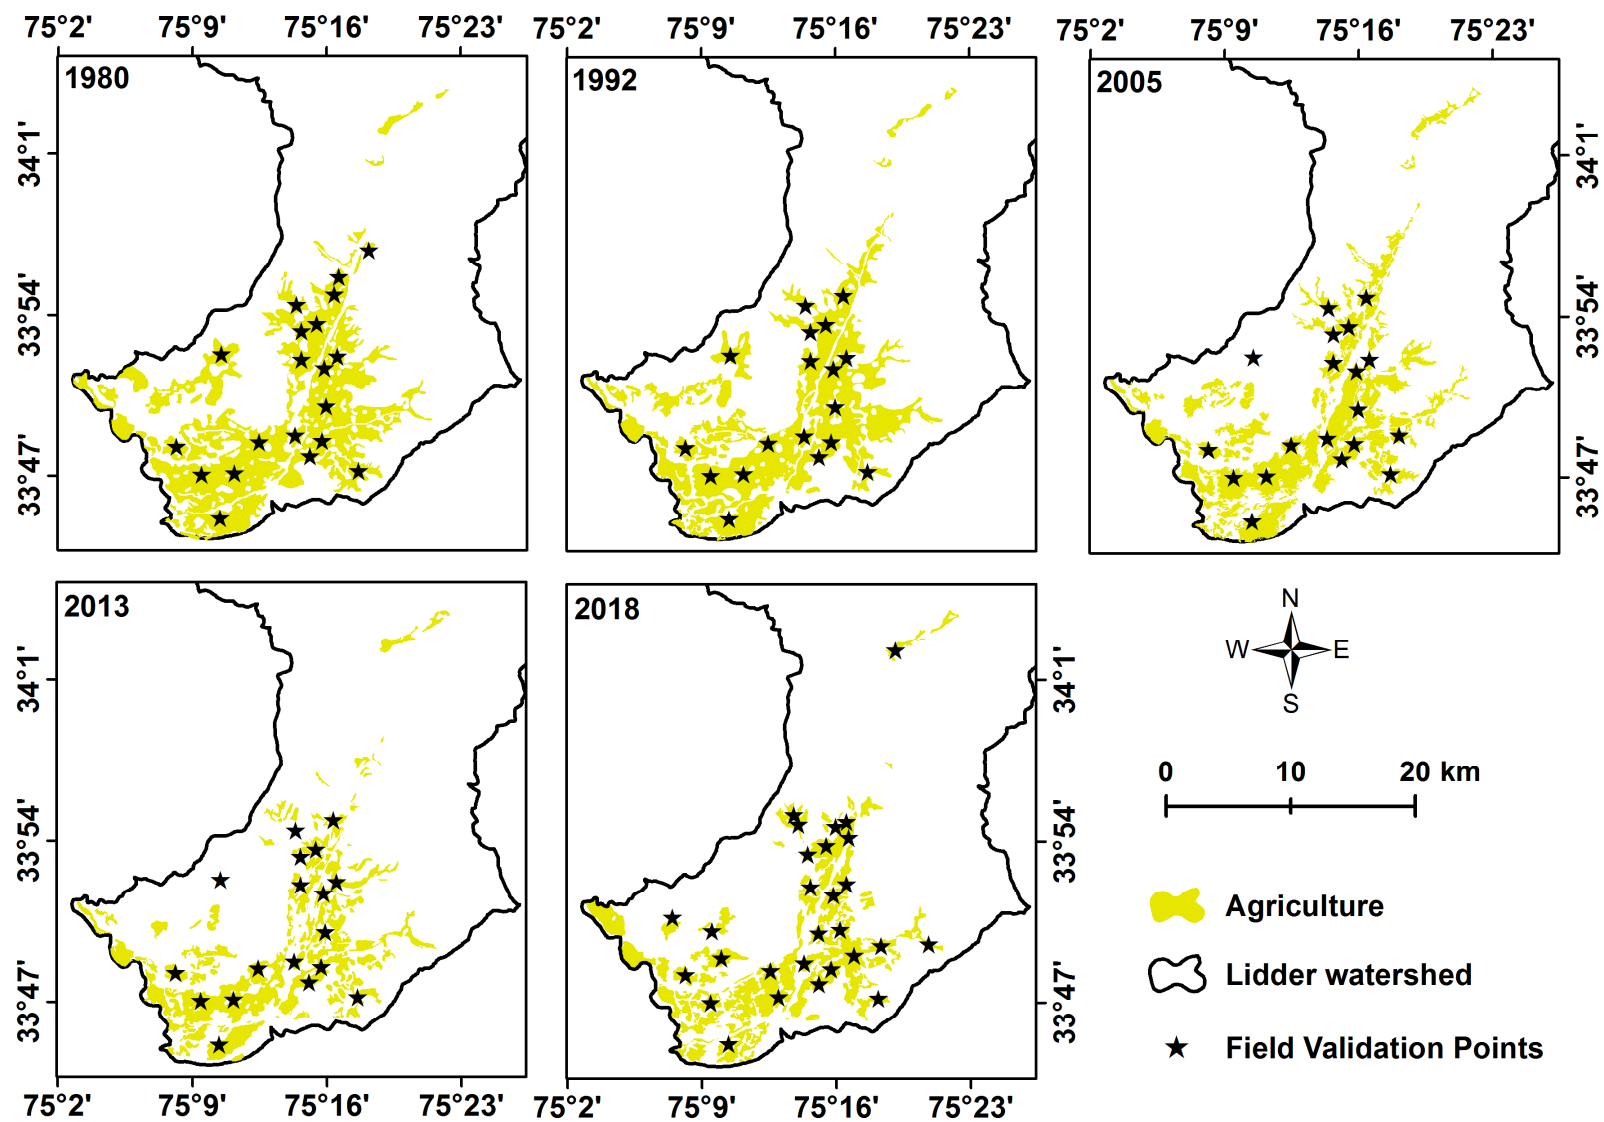

Figure S1. Validation samples for agriculture

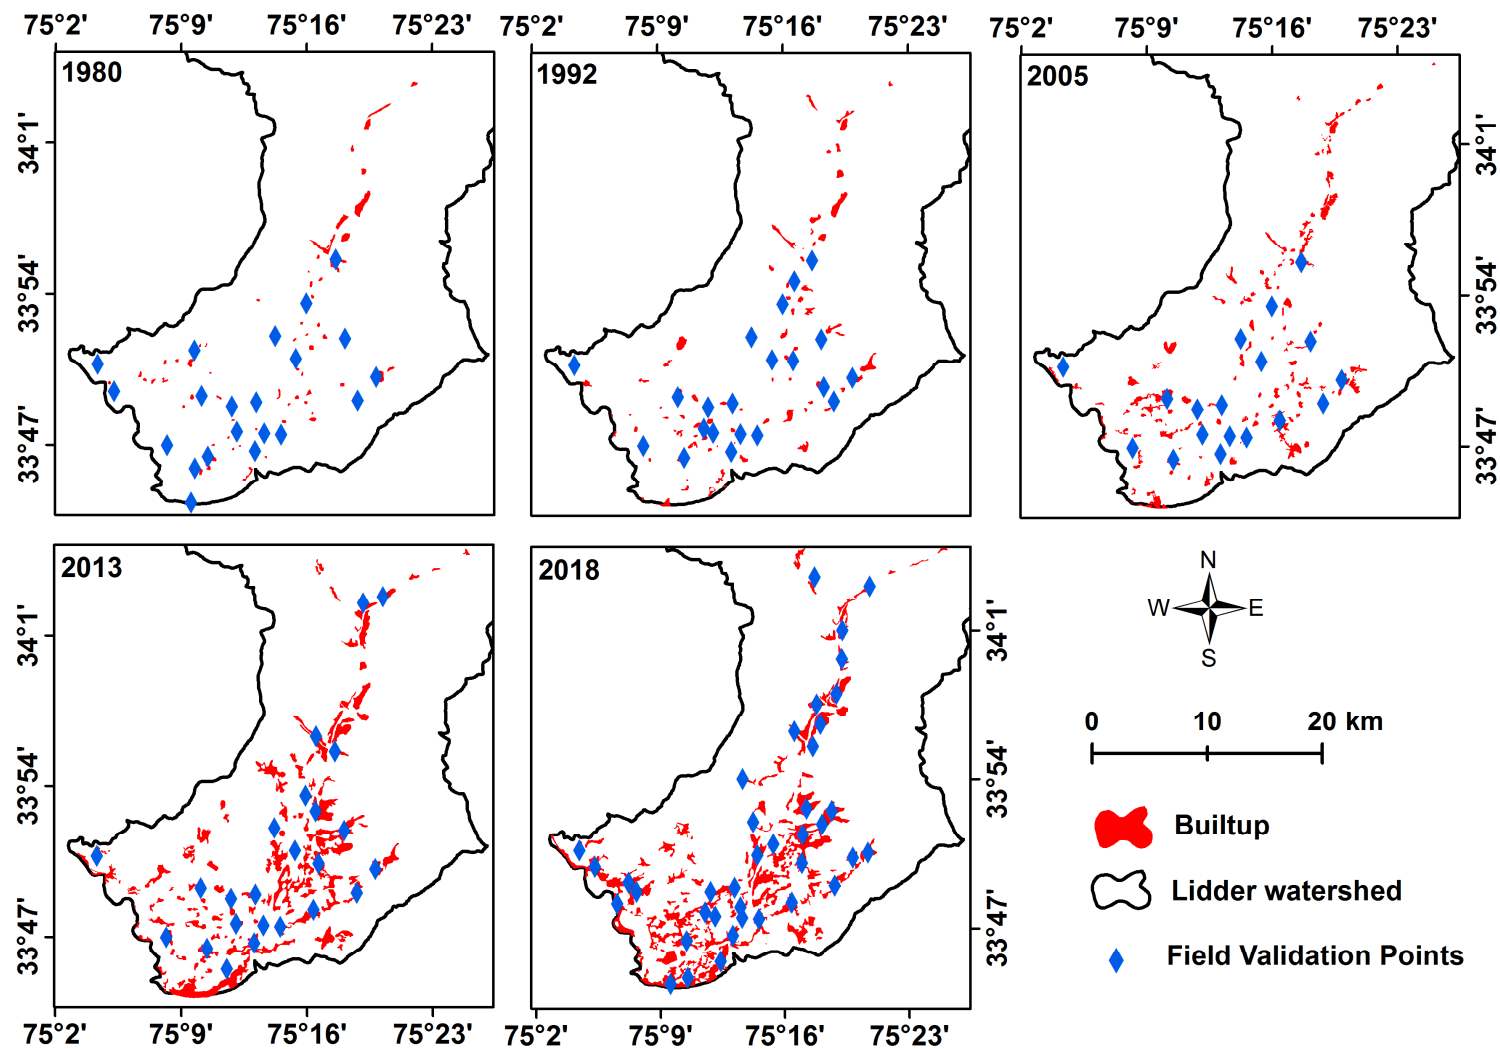

Figure S2. Validation samples for builtup

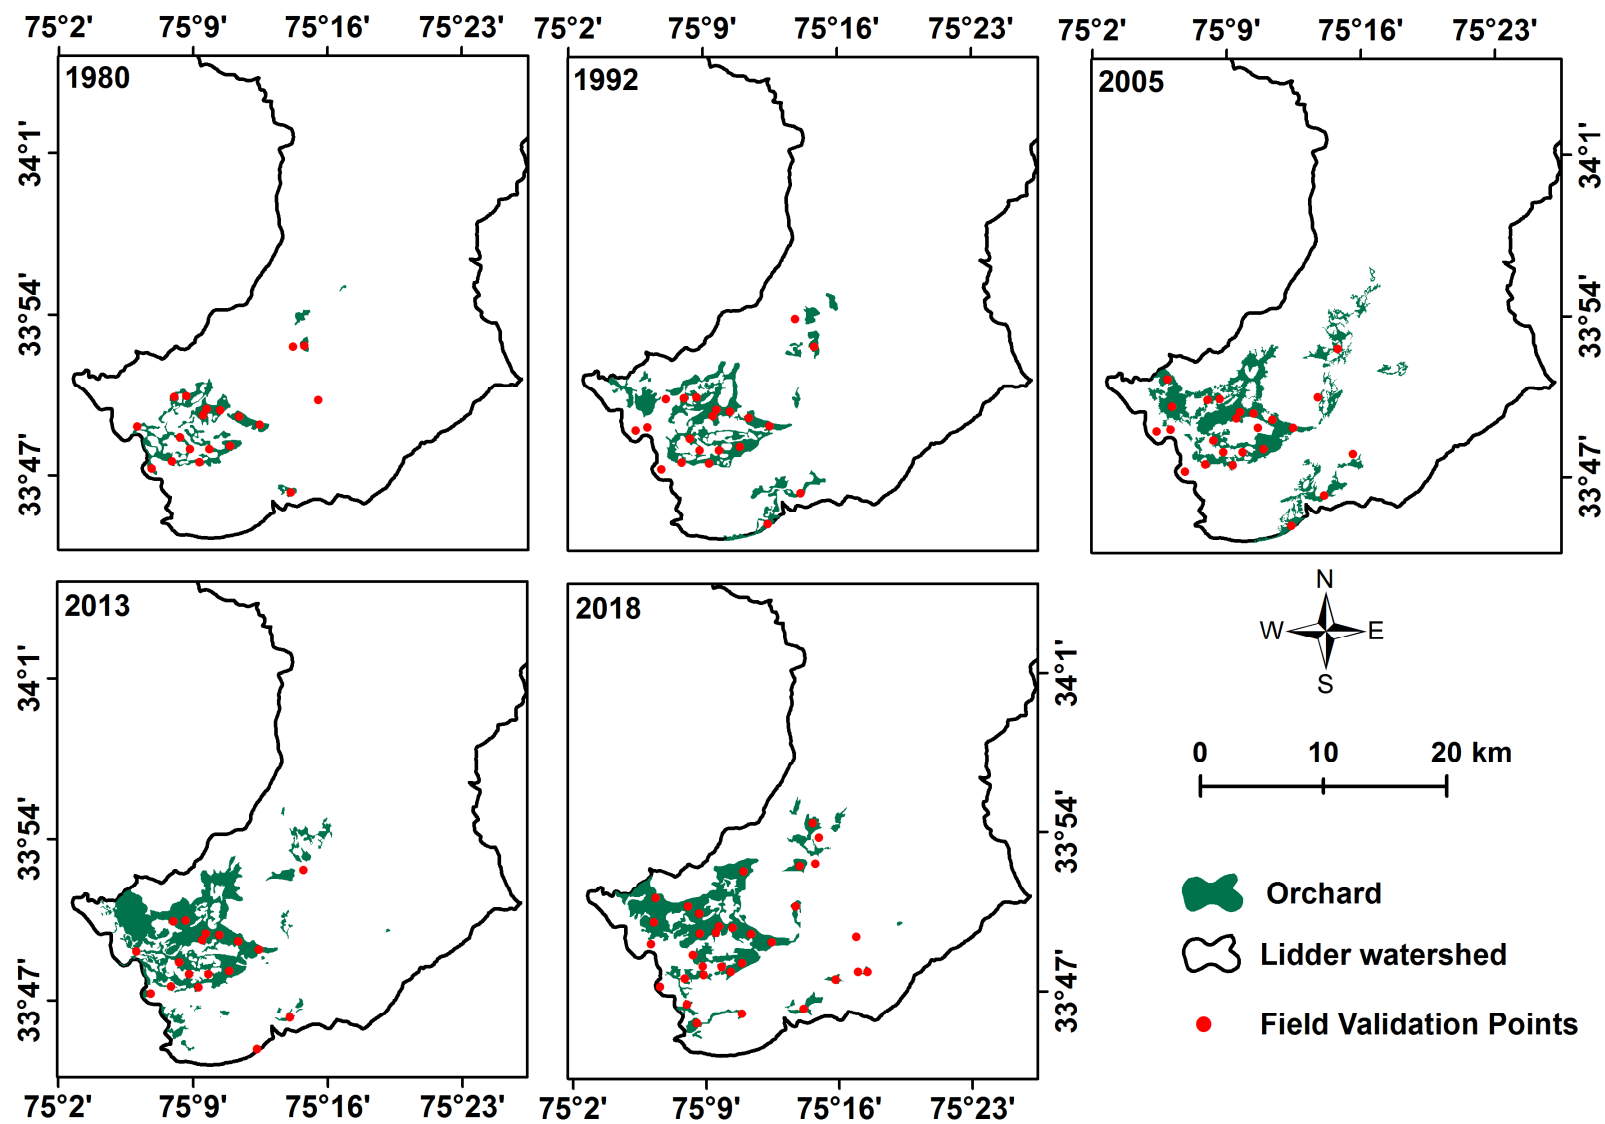

Figure S3. Validation samples for orchards
